# Supplementary material
Source: PubMed Central journal article supplement (PMC6675399)
Supplement: NIHMS1015928-supplement-1.pdf [file NIHMS1015928-supplement-1.pdf]

## Supplementary Materials and Methods

### Study Data

Because data for the population under 20 years of age were unreliable due to a small number of events, we excluded this population from our final analysis. Cause of death was coded using the International Classification of Diseases–Tenth Revision in this dataset. Each observation is one death with demographic characteristics associated with the death.<sup>1</sup>

Because the National Vital Statistic System dataset is de-identified and publicly available, our study did not require approval by the institutional review board.

### Statistical Analysis

This regression fits a series of combined straight lines to trend temporal data, which determines whether

mortality rate is best explained by a single or several trend segments.<sup>2</sup> For each trend segment, the annual percentage change and the average annual percentage change, which is a summary measure of trend accounting for transitions within each trend segment, were calculated. Joinpoint regression calculates the year-to-year percentage change in annual age-standardized mortality rate and the 95% confidence interval over each trend segment.<sup>3</sup>

### References

1. U.S. Census Bureau. The nation's older population is still growing, Census Bureau reports. Available at, <https://www.census.gov/newsroom/press-releases/2017/cb17-100.html>. Accessed January 10, 2017.
2. Kim HJ, Fay MP, Feuer EJ, et al. Permutation tests for joinpoint regression with applications to cancer rates. *Stat Med* 2000; 19:335–351.
3. Clegg LX, Hankey BF, Tiwari R, et al. Estimating average annual per cent change in trend analysis. *Stat Med* 2009;28:3670–3682.

UNCORRECTED PROOF

1045  
1046  
1047  
1048  
1049  
1050  
1051  
1052  
1053  
1054  
1055  
1056  
1057  
1058  
1059  
1060  
1061  
1062  
1063  
1064  
1065  
1066  
1067  
1068  
1069  
1070  
1071  
1072  
1073  
1074  
1075  
1076  
1077  
1078  
1079  
1080  
1081  
1082  
1083  
1084  
1085  
1086  
1087  
1088  
1089  
1090  
1091  
1092  
1093  
1094  
1095  
1096  
1097  
1098  
1099  
1100  
1101  
1102

1103  
1104  
1105  
1106  
1107  
1108  
1109  
1110  
1111  
1112  
1113  
1114  
1115  
1116  
1117  
1118  
1119  
1120  
1121  
1122  
1123  
1124  
1125  
1126  
1127  
1128  
1129  
1130  
1131  
1132  
1133  
1134  
1135  
1136  
1137  
1138  
1139  
1140  
1141  
1142  
1143  
1144  
1145  
1146  
1147  
1148  
1149  
1150  
1151  
1152  
1153  
1154  
1155  
1156  
1157  
1158  
1159  
1160

**Supplementary Table 1.** Age-Standardized Hepatitis C Virus Infection and Alcoholic Liver Disease–Related Mortality Rates as Underlying Cause of Death and APC Among Adults Aged  $\geq 20$  Years in the United States According to Ethnicity Status, 2007–2016

|                                | Age-Standardized Rate |      | Average APC (95% CI) | Trend Segment 1 |                       | Trend Segment 2 |                       |
|--------------------------------|-----------------------|------|----------------------|-----------------|-----------------------|-----------------|-----------------------|
|                                | 2007                  | 2016 | 2007–2016            | Year            | APC (95% CI)          | Year            | APC (95% CI)          |
| <b>Hepatitis C virus</b>       |                       |      |                      |                 |                       |                 |                       |
| Non-Hispanic whites            | 2.66                  | 1.96 | -3.4 (-4.4 to -2.3)  | 2007–2014       | -0.4 (-1.2 to 0.4)    | 2014–2016       | -13.2 (-18.1 to -8.0) |
| All Hispanics                  | 3.3                   | 1.83 | -6.1 (-8.2 to -4.1)  | 2007–2014       | -3.8 (-5.3 to -2.3)   | 2014–2016       | -13.8 (-23.3 to -3.2) |
| Mexicans                       | 3.14                  | 1.81 | -5.3 (-8.2 to -2.3)  | 2007–2014       | -2.6 (-4.7 to -0.4)   | 2014–2016       | -14.2 (-27.5 to 1.4)  |
| Puerto Ricans                  | 7.16                  | 3.87 | -6.6 (-10.7 to -2.3) | 2007–2014       | -2.4 (-5.5 to 0.8)    | 2014–2016       | -20.1 (-37.2 to 1.7)  |
| Cubans                         | 3.52                  | 1.74 | -8.2 (-11.8 to -4.4) |                 |                       |                 |                       |
| <b>Alcoholic liver disease</b> |                       |      |                      |                 |                       |                 |                       |
| Non-Hispanic whites            | 6.48                  | 8.96 | 3.9 (3.1 to 4.6)     | 2007–2013       | 2.9 (2.1 to 3.7)      | 2013–2016       | 5.8 (3.4 to 8.2)      |
| All Hispanics                  | 6.83                  | 7.69 | 1.7 (1.0 to 2.5)     | 2007–2013       | -0.1 (-0.9 to 0.7)    | 2013–2016       | 5.4 (2.9 to 8.0)      |
| Mexicans                       | 7.81                  | 8.4  | 1.4 (-0.4 to 3.2)    | 2007–2012       | -0.6 (-3.4 to 2.2)    | 2012–2016       | 4.0 (-0.0 to 8.2)     |
| Puerto Ricans                  | 5.41                  | 5.97 | 1.7 (-0.1 to 3.4)    |                 |                       |                 |                       |
| Cubans                         | 3.99                  | 5.24 | 1.6 (-8.7 to 13.0)   | 2007–2009       | -23.7 (-56.8 to 34.7) | 2009–2016       | 10.2 (2.2 to 18.9)    |

NOTE. Joinpoint regression analysis was not performed for HBV-related and NAFLD-related mortality due to small sample size (small number of outcomes in certain years). For each trend segment, the APC and the average APC were obtained to outline temporal changes accounting for transitions within each trend segment analyzed by joinpoint regression.

APC, annual percentage change; CI, confidence interval.

**Supplementary Table 2.** Age-Standardized Cirrhosis and Hepatocellular Carcinoma–Related Mortality Rates as Underlying Cause of Death and APC Among Adults Aged  $\geq 20$  years in the United States According to Ethnicity Status, 2007–2016

|                                 | Age-Standardized Rate |       | Average APC (95% CI) | Trend Segment 1 |              | Trend Segment 2 |              |
|---------------------------------|-----------------------|-------|----------------------|-----------------|--------------|-----------------|--------------|
|                                 | 2007                  | 2016  | 2007–2016            | Year            | APC (95% CI) | Year            | APC (95% CI) |
| <b>Cirrhosis</b>                |                       |       |                      |                 |              |                 |              |
| Non-Hispanic whites             | 11.33                 | 14.17 | 2.9 (2.4 to 3.4)     |                 |              |                 |              |
| All Hispanics                   | 10.73                 | 11.61 | 1.1 (0.5 to 1.7)     |                 |              |                 |              |
| Mexicans                        | 11.61                 | 12.86 | 1.5 (0.7 to 2.3)     |                 |              |                 |              |
| Puerto Ricans                   | 12.15                 | 11.85 | 0.4 (-0.8 to 1.5)    |                 |              |                 |              |
| Cubans                          | 10.24                 | 11.79 | 0.6 (-2.4 to 3.7)    |                 |              |                 |              |
| <b>Hepatocellular carcinoma</b> |                       |       |                      |                 |              |                 |              |
| Non-Hispanic whites             | 2.74                  | 3.44  | 2.1 (1.6 to 2.6)     |                 |              |                 |              |
| All Hispanics                   | 2.66                  | 3.16  | 0.9 (-0.4, 2.2)      |                 |              |                 |              |
| Mexicans                        | 2.63                  | 3.31  | 1.8 (0.4 to 3.3)     |                 |              |                 |              |
| Puerto Ricans                   | 4.34                  | 5.51  | 1.0 (-1.2 to 3.2)    |                 |              |                 |              |
| Cubans                          | 2.66                  | 3.16  | -0.5 (-4.9 to 4.1)   |                 |              |                 |              |

NOTE. For each trend segment, the APC and the average APC were obtained to outline temporal changes accounting for transitions within each trend segment analyzed by joinpoint regression.

APC, annual percentage change; CI, confidence interval.
